# Supplementary material for: Neuronal integration in the adult mouse olfactory bulb is a non-selective addition process
Source: eLife. 2019 Jul 11;8:e44830. doi: 10.7554/eLife.44830 (PMC6634973; doi:10.7554/eLife.44830)
Supplement: Source data 1. [file elife-44830-data1.xlsx]

## Sheet: fig2A
	number of neurons over time			PGN postnatal
		weeks
		3	4	5	6	7	8
	animals
	ani123	99	97	96	96	96	96
	ani124	66	64	64	64	64	64
	ani 125	88	88	86	86	85	85
	ani126	77	69	69	68	68	68
	ani58	94	87	87	87	85	85
	ani 19	18	18	18	18	18	18
	ani156	60	54	54	54	54	54
	ani157	64	64	62	62	62	62
	ani158	80	79	77	77	76	75
	ani159	67	67	65	65	65	65
	ani118	50	50	50	50	50	49

## Sheet: fig2B
	number of neurons over time			GC postnatal
		weeks
	animals	3	4	5	6	7	8
	126	21	21	21	21	21	21
	155	50	50	50	50	50	50
	156	20	20	20	20	20	20
	157	40	40	40	40	40	40
	158	27	27	27	27	27	27
	159	30	30	30	30	30	30

## Sheet: Fig2C
	number of neurons over time			PGN adult
		Weeks
		1	2	3	4	5	6	7	8
	animals
	ani45	122	120	119	119	119	119	118	118
	ani46	179	176	175	175	175	174	174	173
	ani47b	103	102	102	102	102	102	102	102
	ani50	40	40	40	40	40	40	40	40
	ani101	20	20	20	20	20	20	20	20

## Sheet: fig3c
						weeks
		animal
			1.85714	2.71429	3.85714	5.14286	6.71429	9.28571
		202	29	29	29	28	28	28
			2	3.28571	4.85714	6	7.42857
		203	14	12	12	12	12
			1.71429	2.71429	4	5.28571	6.71429	7.85714
		204	12	12	12	12	11	11
			2.71429	4	5.28571	6.71429	7.85714	9.28571
		205	2	2	2	2	2	2
			1.71429	2.71429	4	5.28571	6.71429	9.28571
		206	6	6	6	6	6	6
			1.71429	2.71429	3.85714	5.28571	6.71429	7.85714	9.28571
		207	14	14	14	14	14	14	14
			2	4.57143	7
		210	11	11	11
			2	3	4.42857	6.71429
		211	10	10	8	8
			2	3	3.85714	6.71429	7.57143	9
		214	3	3	3	3	3	3

## Sheet: fig4c
% death
	control	occlusion
	3.27869	9.83607
	3.35196	10.5263
	0.97087	20
	0
	0
	0
	4.54545
	0

## Sheet: fig5b
BrdU density (10^3/mm3)		brdu50	brdu50	brdu 50	brdu 50	brdu 50	brdu 50
		2weeks PG	6weeks PG	2w dor	6Wdor	2W GC	6W GC
		4218.06	2161.3	4124.98	1835.72	21434.8	18169
		3959.54	2683.18	4185.98	2751.62	21922.2	16953.2
		4934.44	2739.85	5096.7	2463.45	32936.4	17134
		4333.33	2305.29	4492.37	1775.13	23986.4	17189.6
		4507.5	2363.53	4708.64	2403.03	27018.9	15802.1

## Sheet: fig5e
EdU density (10^3/mm3)		edu50mg/kg	edu50	edu50	edu50	edu 1mg/kg	edu 1	edu 1	edu 1
		2W PG	6W PG	2W GC	6W GC	2w PG	6W PG	2w GC	6WGC
		5814.2	3495.37	27808.4	18473.6	3290.37	3119.36	15402.1	21446.3
		5048.4	3881.55	25234.3	15734.9	4208.62	3539.54	19708.4	11757.6
		4283.5	3019.56	30217.4	18269.2	1488.7	4000.2	10526	14296.2
		5675.5	3965.35	29078.9	17601.1	4288.72	3098.29	16957.9	15612
		9135.6	4537.14	24446.2	19577.7	3496.17	3600.73	17134.8	20349

## Sheet: fig5f
EdU density (10^3/mm3)
		2W sup GCL	6W sup GCL	2W deep GCL	6W deep GCL	2W sup GCL	6W sup GCL	2W deep GCL	6W deep GCL
		50	50	50	50	5	5	5	5
		24437.2	15030.6	32757.5	22938.9	15534.7	14954.1	21111.7	23140.6
		20587	12824.3	30737.3	19334.9	10333.3	10677.2	18970.9	17505.1
		24007.6	13557.9	37798.6	23920.6	12683.8	13789.3	17910.1	19021.3
		24768.3	15521.1	34189.7	20420.6	14216.7	14236.5	22905.7	25605
		18807.6	13876.7	31679.3	26683.3	12870.2	15948.4	22793	22862.7

## Sheet: fig5h
% caspase 3/edu positive
	5mg 2weeks	50mg 2weeks	50mg 6weeks
	1.21617	0.22014	0.13661
	0.20513	0.24434	0.13441
	0.41821	0.08306	0.35313
	0.25575	0.20885	0
	0	0.07082	0

## Sheet: fig5i
CC3 density(/mm3)
		RMS	GCL	PGL
		545.165	499.279	176.376
		1635.98	496.959	105.483
		2284.42	379.924	215.766
		1456.42	517.606	170.377
		1121.32	570.13	125.271
		689.876	251.02	130.818
		1880.45	314.468	151.484
		589.176	70.0202	74.0058
		1780.71	337.523	87.6154
		1383.45	352.342	126.617
		3229.71	454.397	134.152
		1259.3	196.92	127.823
		2174.97	371.272	91.2114
		2088.14	330.494	140.317
		2598.38	295.882	113.238

[truncated: 10 more sheets: fig6a, fig6b, fig6c, fig6d, fig6f, fig7b, fig7e, fig7f, fig7g, fig7i]
